# Supplementary material
Source: PubMed Central journal article supplement (PMC2943275)
Supplement: supp_M110.118513_jbc.M110.118513-1.pdf [file supp_M110.118513_jbc.M110.118513-1.pdf]

## ONLINE SUPPLEMENTARY MATERIAL

### EXPLOITING ANTIGENIC DIVERSITY FOR VACCINE DESIGN: THE CHLAMYDIA ARTJ PARADIGM

**Marco Soriani, Pierre Petit<sup>1</sup>, Renata Grifantini<sup>†</sup>, Roberto Petracca, Giovanni Gancitano, Elisabetta Frigimelica, Filomena Nardelli, Christel Garcia<sup>1</sup>, Silvia Spinelli<sup>2</sup>, Guido Scarabelli<sup>3</sup>, Sebastien Fiorucci<sup>4‡</sup>, Roman Affentranger<sup>5</sup>, Mario Ferrer-Navarro<sup>5</sup>, Martin Zacharias<sup>4°</sup>, Giorgio Colombo<sup>3</sup>, Laurent Vuillard<sup>1</sup>, Xavier Daura<sup>5,6</sup> and Guido Grandi**

Novartis Vaccines, Via Fiorentina 1, 53100, Siena, Italy; <sup>1</sup>BioXtal Structural Biology unit. c/o AFMB, UMR 6098, CNRS-Universités Aix-Marseille I & II, Campus de Luminy, 13288 Marseille Cedex 09, France; <sup>2</sup>AFMB, UMR 6098, CNRS-Universités Aix-Marseille I & II, Campus de Luminy, 13288 Marseille Cedex 09, France; <sup>3</sup>Istituto di Chimica del Riconoscimento Molecolare, CNR. Via Mario Bianco 9, 20131 Milano, Italy; <sup>4</sup>Jacobs University Bremen, Campus Ring 6, D-28759 Bremen, Germany; <sup>5</sup>Institute of Biotechnology and Biomedicine (IBB), Universitat Autònoma de Barcelona (UAB), 08193 Bellaterra, Spain; <sup>6</sup>Catalan Institution for Research and Advanced Studies (ICREA), 08010 Barcelona, Spain

<sup>†</sup> Current address: Externautics Spa, Via Fiorentina 1, 53100, Siena, Italy

<sup>‡</sup> Current address: LCMBA, UMR 6001, Université de Nice Sophia Antipolis, 06108 Nice Cedex 2, France

<sup>°</sup> Current address: Technische Universität München, 85748 Garching, Germany

**Running head:** A new structure-based approach for vaccine design

**Address correspondence to:** Guido Grandi, Novartis Vaccines and Diagnostics, Via Fiorentina 1, 53100, Siena, Italy. Tel: +390577243390. Fax: +390577243564. E-mail: [guido.grandi@novartis.com](mailto:guido.grandi@novartis.com)

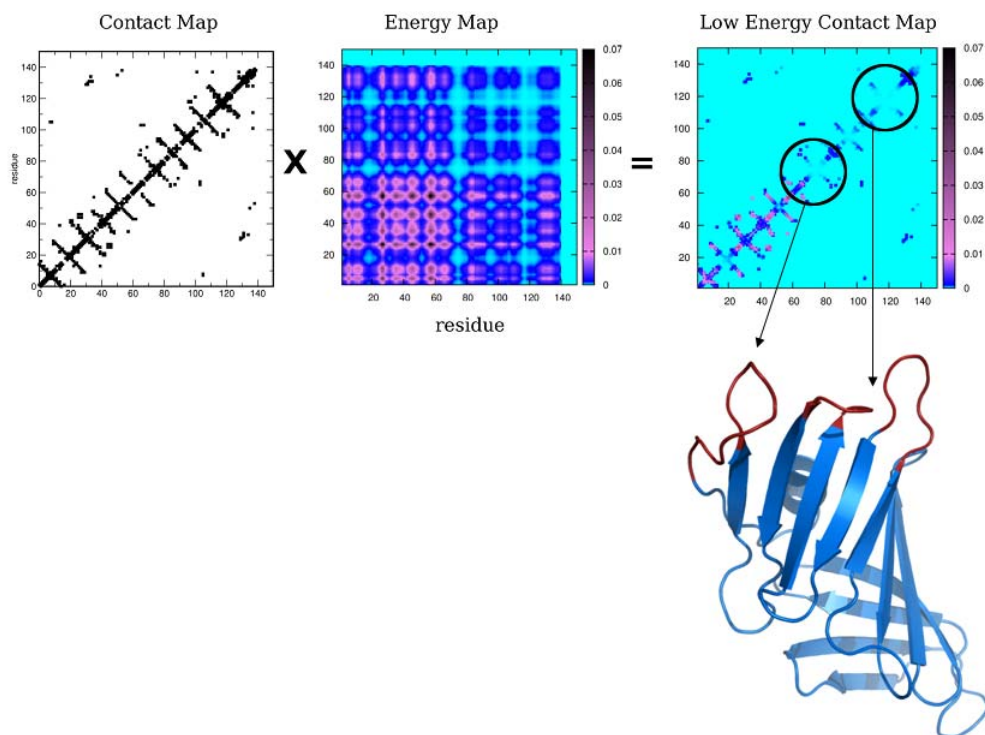

**Figure S1.** Schematic representation of the energy-decomposition-based epitope-prediction method. The contact map is multiplied by the simplified energy-coupling matrix. The resulting matrix reports the energetic coupling intensity of two residues in contact in space, represented as a colour scale assigned to each point of the matrix. The weakest local interactions vanish in the background colour: predicted epitopes are identified with circles. The arrows indicate the projections of the predicted epitope regions on the 3D structure of the protein.

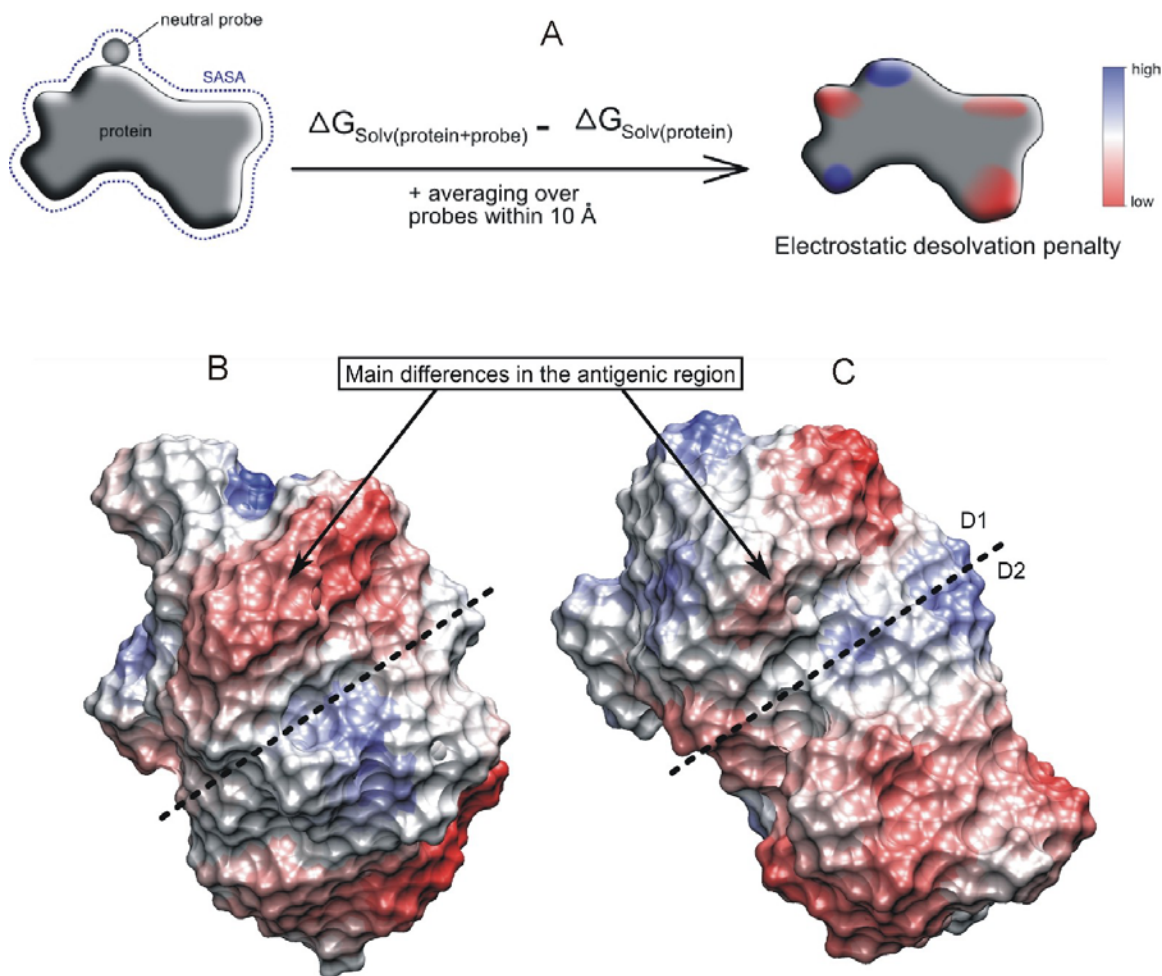

**Figure S2:** (A) Schematic illustration of the electrostatic desolvation calculation of a neutral probe placed at the protein surface. Regions with low electrostatic desolvation free energy appear in red while those with high penalty are blue. Desolvation surface profiles of CPn ArtJ (B) and CT ArtJ (C). The calculated profiles of both proteins exhibit some differences in the D1 domain, suggesting a larger desolvation penalty of CT ArtJ compared to CPn ArtJ. The dashed line marks the boundary between domains D1 and D2.

A

|          |     |                                                                                                     |     |
|----------|-----|-----------------------------------------------------------------------------------------------------|-----|
| CT ArtJ  | 21  | LTGCLKEGGDSNSEKFIVGTNATYPPFEFVDKRGEVVGFDIDLAREISNKLKGLD <b>VREF</b>                                 | 80  |
|          |     | LT C E + +IVGTNATYPPFE+VD +GEVVGFDIDLA+ IS KLGK L+V <b>REF</b>                                      |     |
| CPn ArtJ | 20  | LTSC--ESKIDRNRIWIVGTNATYPPFEYV <b>DAQGEVVGFDIDLAKAISEKLGKQLEVREF</b>                                | 77  |
| CT ArtJ  | 81  | <b>SFDALILNLKQHRIDAVITGMSITPSRLKEILMIPYYGEEIKHLVLVFKGENKHP-LPLT</b>                                 | 139 |
|          |     | +FDALILNLK+HRIDA++ GMSITPSR KEI ++PYYG+E++ L++V K + P L <b>PLT</b>                                  |     |
| CPn ArtJ | 78  | <b>AFDALILNLK<del>HRIDAILAGMSITPSRQKEI</del>ALLPYYGDE<b>VQELMVVSKRSLETPVLPLT</b></b>                | 137 |
| CT ArtJ  | 140 | <b>QYRSVAVQ</b> TGTQ <b>EAYLQSLSEVHIRSFDSTLEVLMEVMHGKSPVAVLEPS</b> <b>IAQVVLKDF</b>                 | 199 |
|          |     | QY SVAVQ <b>TGT+QE YL S + +RSFDSTLEV+MEV +GKSPVAVLEPS+ +VVLKDF</b>                                  |     |
| CPn ArtJ | 138 | <b>QYSSVAVQ</b> TGT <b>QEHYLLSQPGICVRSFDSTLEVIMEVRYGKSPVAVLEPSVGRVVLKDF</b>                         | 197 |
| CT ArtJ  | 200 | <b>PALSTATIDLPEDQ</b> WVLGYGIGV <b>ASDRPAL</b> LKIEAAVQEIRKEGVLA <b>EAEQKWGLN</b>                   | 256 |
|          |     | P L ++LP + WVLG G+GVA DRP I+ A+ +++ EGV+ L +KW L+                                                   |     |
| CPn ArtJ | 198 | <b>PNLVATRLELPPEC</b> WVLGCGLG <b>AKDRP</b> EEI <b>QTIQQA</b> ITDLK <b>SEGV</b> IQSLTKK <b>WQLS</b> | 254 |

B

|          |     |                                                                                                     |     |
|----------|-----|-----------------------------------------------------------------------------------------------------|-----|
| CT ArtJ  | 21  | LTGCLKEGGDSNSEKFIVGTNATYPPFEFVDKRGEV <b>VGFDIDLAREISNKLKGLD<b>VREF</b></b>                          | 80  |
|          |     | LT C E + +IVGTNATYPPFE+VD +GEVVGFDIDLA+ IS KLGK L+V <b>REF</b>                                      |     |
| CPn ArtJ | 20  | LTSC--ESKIDRNRIWIVGTNATYPPFEYV <b>DAQGEVVGFDIDLAKAISEKLGKQLEVREF</b>                                | 77  |
| CT ArtJ  | 81  | <b>SFDALILNLKQHRIDAVITGMSITPSRLKEILMIPYYGEEIKHLVLVFKGENKHP-LPLT</b>                                 | 139 |
|          |     | +FDALILNLK+HRIDA++ GMSITPSR KEI ++PYYG+E++ L++V K + P L <b>PLT</b>                                  |     |
| CPn ArtJ | 78  | <b>AFDALILNLK<del>HRIDAILAGMSITPSRQKEI</del>ALLPYYGDE<b>VQELMVVSKRSLETPVLPLT</b></b>                | 137 |
| CT ArtJ  | 140 | <b>QYRSVAVQ</b> TGTQ <b>EAYLQSLSEVHIRSFDSTLEVLMEVMHGKSPVAVLEPS</b> <b>IAQVVLKDF</b>                 | 199 |
|          |     | QY SVAVQ <b>TGT+QE YL S + +RSFDSTLEV+MEV +GKSPVAVLEPS+ +VVLKDF</b>                                  |     |
| CPn ArtJ | 138 | <b>QYSSVAVQ</b> TGT <b>QEHYLLSQPGICVRSFDSTLEVIMEVRYGKSPVAVLEPSVGRVVLKDF</b>                         | 197 |
| CT ArtJ  | 200 | <b>PALSTATIDLPEDQ</b> WVLGYGIGV <b>ASDRPAL</b> LKIEAAVQEIRKEGVLA <b>EAEQKWGLN</b>                   | 256 |
|          |     | P L ++LP + WVLG G+GVA DRP I+ A+ +++ EGV+ L +KW L+                                                   |     |
| CPn ArtJ | 198 | <b>PNLVATRLELPPEC</b> WVLGCGLG <b>AKDRP</b> EEI <b>QTIQQA</b> ITDLK <b>SEGV</b> IQSLTKK <b>WQLS</b> | 254 |

**Figure S3.** Graphical representation of the experimental and computational epitope mappings of CT and Cpn ArtJ. Sequence alignment of the two proteins with conserved residues in middle row. The beginning and end of D2 are marked with vertical lines. Experimentally determined epitopes are identified by a yellow background in both (A) and (B). Very low reactivity regions of CPn ArtJ are colored in light blue. (A) Epitope regions predicted by the energy-decomposition method are shown in red font, and highlighted bold when they overlap with experimentally determined epitope regions. (B) Epitope regions predicted by the electrostatic-desolvation free-energy method are shown in red font, and highlighted bold when they overlap with experimentally determined epitope regions.

**Table S1.** Computational epitope mapping.

| <b>Energy-decomposition-based prediction</b>                                                                                                                          |                                                                                                                                                                                                               |
|-----------------------------------------------------------------------------------------------------------------------------------------------------------------------|---------------------------------------------------------------------------------------------------------------------------------------------------------------------------------------------------------------|
| <b>CT ArtJ regions</b>                                                                                                                                                | <b>CPn ArtJ regions</b>                                                                                                                                                                                       |
| 44-YPPFEFVDKRGE-55<br>76-DVREFSFDA-84<br>121-IKHLVLVFKGENKHLPLTQYRSVAVQ-147<br>191-IAQVVLKDFPALSTATIDLPE-212<br>226-RPA-228                                           | 41-YPP-43<br>48-DAQGEVV-54<br>77-FAFDALILNLKKH-89<br>96-AGMSITPSRQKEIALLPYYGDEVQELMVVSKR<br>SLETPVLPLTQY-139<br>157-QPGI-160<br>195-KDFPNLVATRLELPPEC-211<br>221-AKDRP-225<br>241-EGV-243                     |
| <b>Electrostatic-desolvation-based prediction</b>                                                                                                                     |                                                                                                                                                                                                               |
| <b>CT ArtJ regions</b>                                                                                                                                                | <b>CPn ArtJ regions</b>                                                                                                                                                                                       |
| 57-VGFDID-62*<br>80-FSFD-83*<br>109-KEILMIPYYGE-119<br>123-HLVLVFKGENKHLPLTQYRSV-144<br>169-STLEVL-175<br>184-VAVLEPSIAQVVLKDFPALSTATIDL-210<br>222-VASDRPALALKIE-234 | 46-YVDAQGEVVGFD-57*<br>76-EFAF-79*<br>109-ALL-111<br>119-QELMVVSKRSLETPVLPLTQYSSV-142<br>149-FQEHYLLSQPGICV-162<br>179-KSPVAV-184<br>203-TRLELPPECW-212<br>220-VAKDRPEEIQTIQQA-234<br>241-EGVIQSLTKKWQLS-254* |

\*Predicted for isolated domains

**Table S2.** Characterization of the epitopes predicted by the two computational methods.

|                                                                           | Energy-decomposition-based prediction |          | Desolvation-penalty-based prediction |          |
|---------------------------------------------------------------------------|---------------------------------------|----------|--------------------------------------|----------|
|                                                                           | CT ArtJ                               | CPn ArtJ | CT ArtJ                              | CPn ArtJ |
| Epitopes in D1                                                            | 3                                     | 6        | 4                                    | 5        |
| Epitopes in D2                                                            | 2                                     | 3        | 3                                    | 4        |
| Epitopes in D1 overlapping experimental ones                              | 3                                     | 4        | 4                                    | 4        |
| Epitopes in D2 overlapping experimental ones                              | 2                                     | 2        | 2                                    | 1        |
| Residues in D1 epitopes                                                   | 24                                    | 53       | 34                                   | 48       |
| Residues in D2 epitopes                                                   | 49                                    | 43       | 53                                   | 54       |
| Residues in D1 epitopes overlapping experimental ones                     | 24                                    | 44       | 26                                   | 28       |
| Residues in D2 epitopes overlapping experimental ones                     | 15                                    | 19       | 13                                   | 10       |
| Epitopes in D1 not overlapping with those in the ortholog protein         | 0                                     | 2        | 0                                    | 1        |
| Epitopes in D2 not overlapping with those in the ortholog protein         | 0                                     | 1        | 1                                    | 1        |
| Epitope residues in D1 not overlapping with those in the ortholog protein | 9                                     | 38       | 11                                   | 25       |
| Epitope residues in D2 not overlapping with those in the ortholog protein | 12                                    | 7        | 25                                   | 22       |
